# Supplementary material for: Poly(arylene ether ketone)-based bipolar membranes for acid–alkaline water electrolysis applications
Source: Royal Society of Chemistry journal article supplement (doi:10.1039/d0ta09398j), 2020-12-28
Supplement: d0ta09398j1.pdf [file d0ta09398j1.pdf]

## Supporting Information

### **Poly (arylene ether ketone)-based Bipolar Membrane for Acid-alkaline Water Electrolysis Application**

*Lynn Lee and Dukjoon Kim\**

School of Chemical Engineering, Sungkyunkwan University, Gyeonggi 16419, Republic of  
Korea.

[\*] Corresponding author:

Dukjoon Kim

School of Chemical Engineering, Sungkyunkwan University, Suwon, Gyeonggi 440 – 746,  
Republic of Korea.

Tel.: +82 31 290 7250

Fax: +82 31 290 7270

Email address: [djkim@skku.edu](mailto:djkim@skku.edu) (D.Kim)



## Supporting Figures:

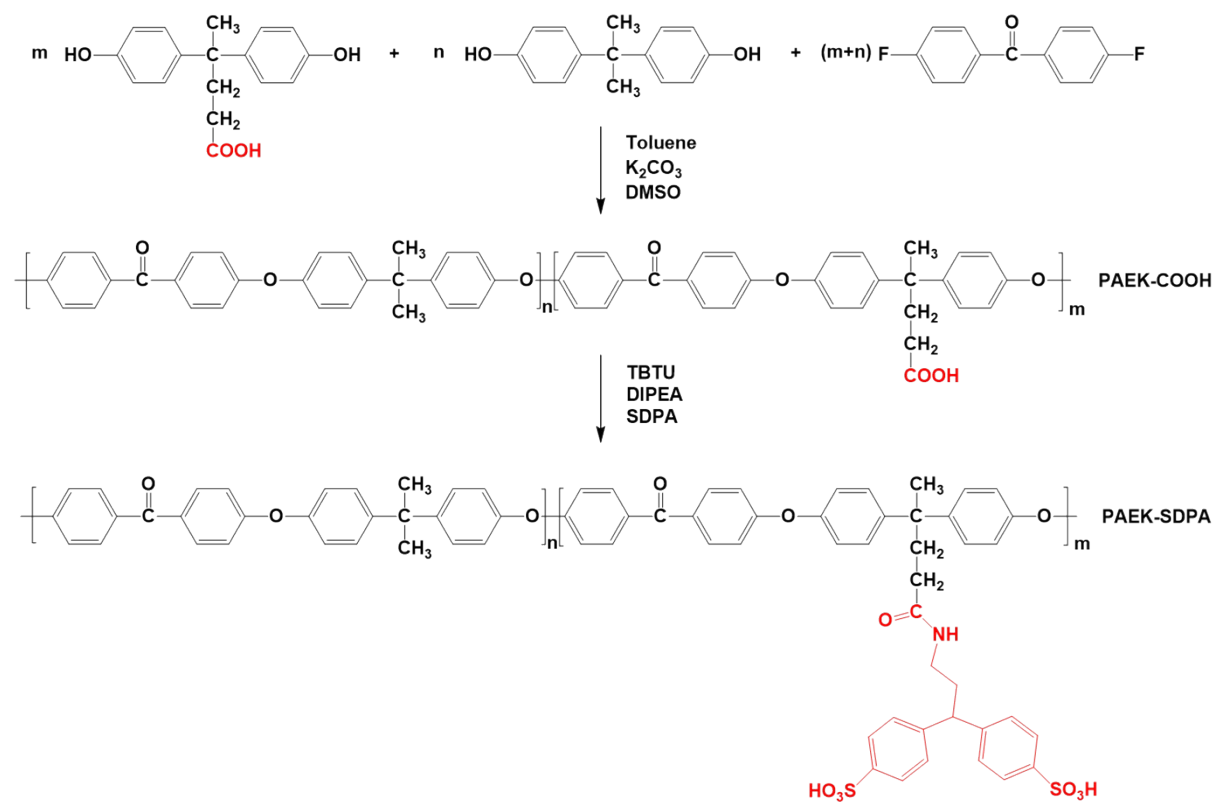

**Fig. S1** Synthetic scheme of PAEK-SDPA.

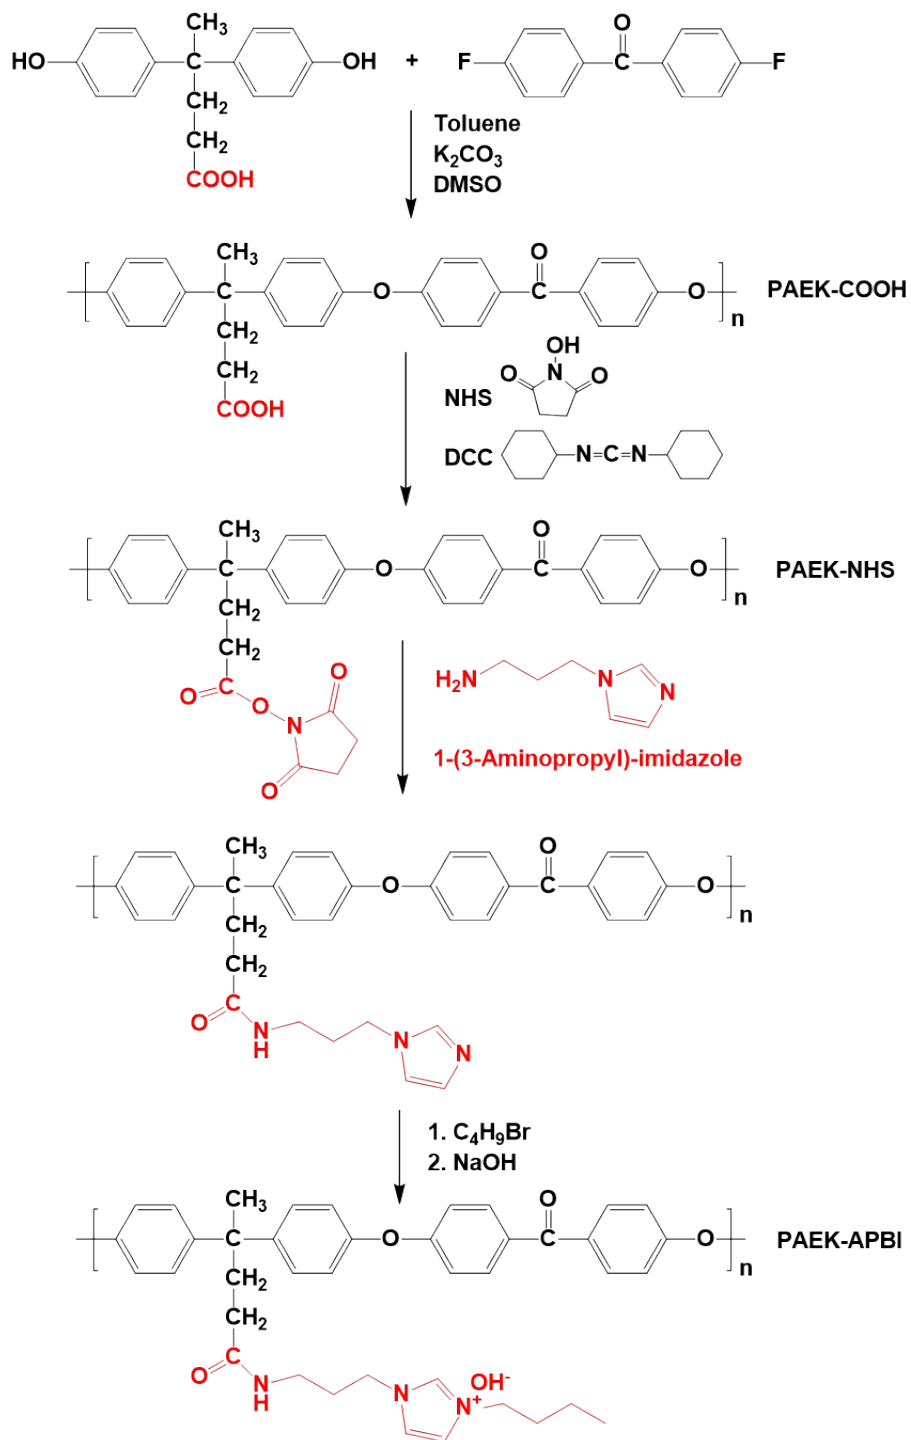

Fig. S2 Synthetic scheme of PAEK-APBI.

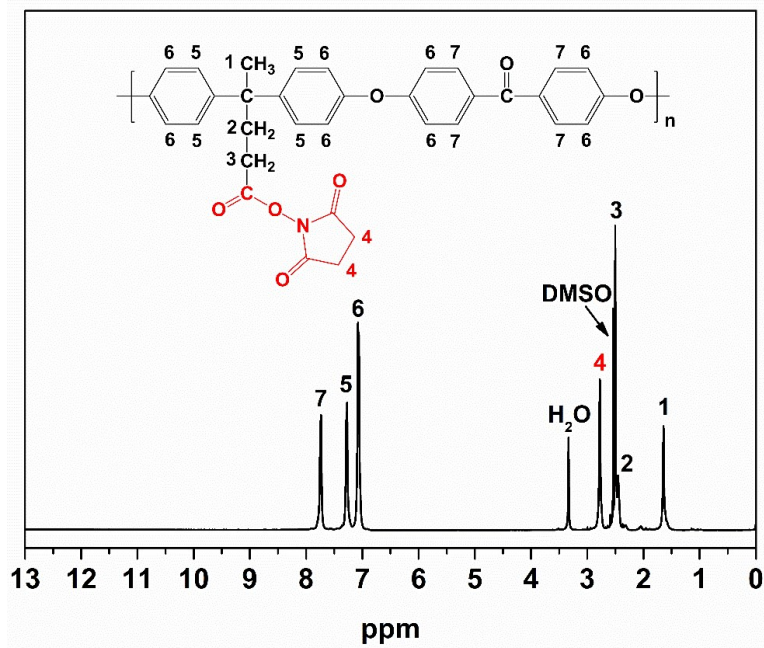

Fig. S3 <sup>1</sup>H NMR spectra of PAEK-NHS.

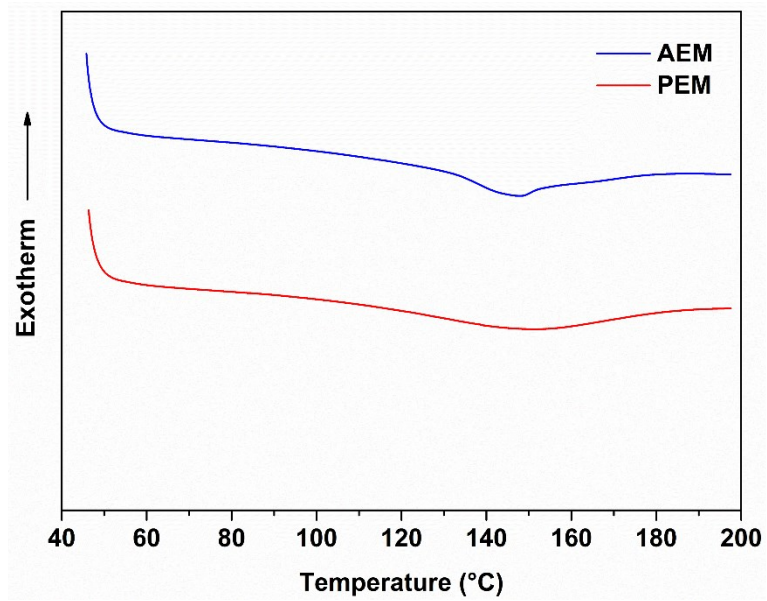

**Fig. S4** DSC curve of AEM and PEM.
